# Supplementary material
Source: PubMed Central journal article supplement (PMC6707038)
Supplement: Supp_Fig1-2.pdf [file Supp_Fig1-2.pdf]

## Supplementary Data

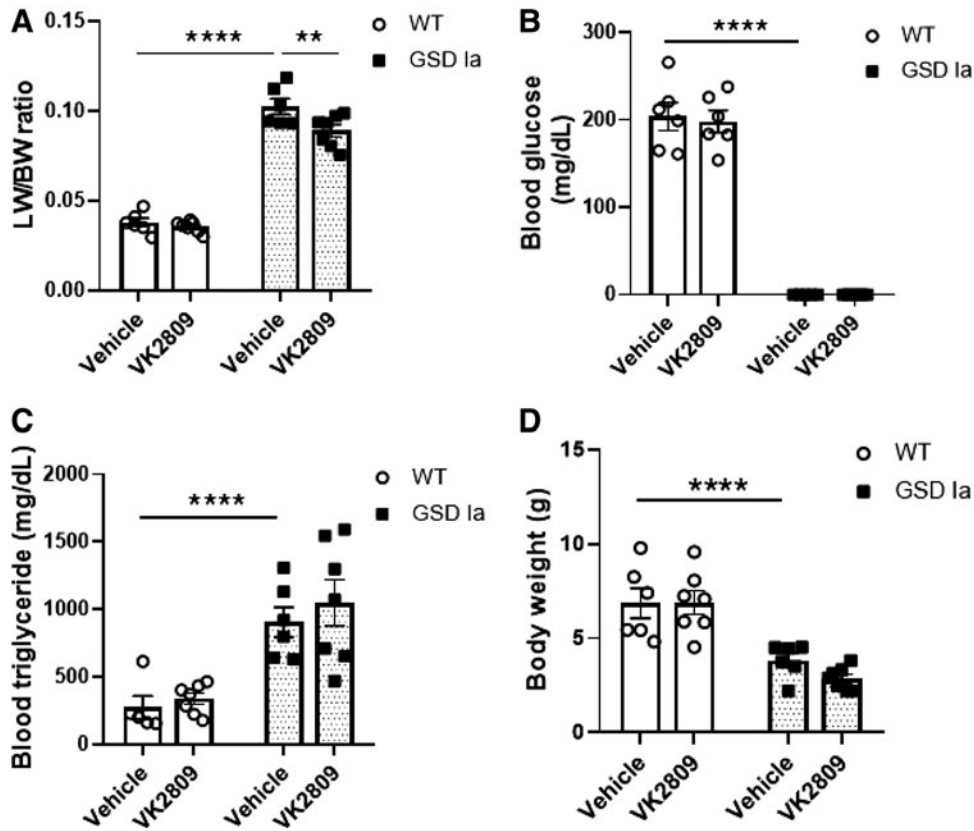

**SUPPLEMENTARY FIG. S1.** VK2809 treatment did not affect blood triglyceride and glucose, or body weight in GSD Ia mice. (A) VK2809 treatment decreased liver weight/body weight ratio in GSD Ia mice. (B) VK2809 treatment did not change blood triglyceride concentrations. (C) VK2809 treatment did not affect blood glucose level. (D) VK2809 treatment did not affect body mass. Bars represent mean  $\pm$  SEM. \*\* $p < 0.01$  and \*\*\*\* $p < 0.0001$  from two-way ANOVA followed by Fisher's LSD multiple comparisons test. ANOVA, analysis of variance; LSD, least significant difference; GSD Ia, glycogen storage disease type Ia; SEM, standard error of the mean.

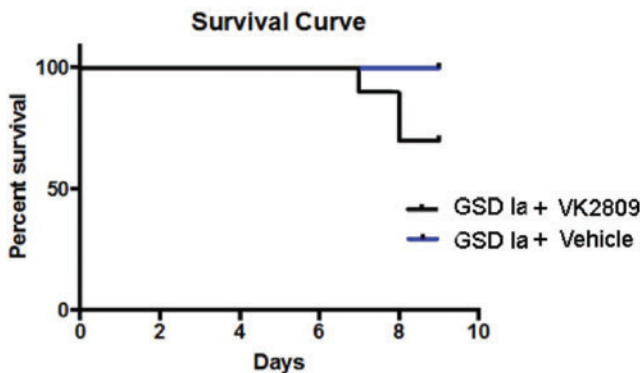

**SUPPLEMENTARY FIG. S2.** Survival curve in GSD Ia mice with vehicle or VK2809 treatment.
